# Supplementary material for: The distinct clinical features and prognosis of the CD10+MUM1+ and CD10−Bcl6−MUM1− diffuse large B-cell lymphoma
Source: PubMed Central journal article supplement (PMC4746587; doi:10.1038/srep20465), 2016-02-09

**Title**

The distinct clinical features and prognosis of the CD10<sup>+</sup>MUM1<sup>+</sup> and CD10<sup>-</sup>Bcl6<sup>-</sup>MUM1<sup>-</sup> diffuse large B-cell lymphoma

**Name of authors**

Ting-Xun Lu, Yi Miao, Jia-Zhu Wu, Qi-Xing Gong, Jin-Hua Liang, Zhen Wang, Li Wang, Lei Fan, Dong Hua, Yao-Yu Chen, Wei Xu, Zhi-Hong Zhang, Jian-Yong Li

**Table S1.** The clinical characteristics between the total cohort and the chemoimmunotherapy cohort

| Variables        | Total cohort<br>no. (%) | R-CHOP-like cohort<br>no. (%) | <i>P</i> value |
|------------------|-------------------------|-------------------------------|----------------|
| <b>Age</b>       | 601                     | 306                           |                |
| > 60y            | 259 (43.1)              | 133 (43.5)                    | 0.915          |
| ≤ 60y            | 342 (56.7)              | 173 (56.5)                    |                |
| <b>Sex</b>       | 601                     | 306                           |                |
| Male             | 345 (57.4)              | 180 (58.8)                    | 0.682          |
| Female           | 256 (42.6)              | 126 (41.2)                    |                |
| <b>LDH</b>       | 600                     | 306                           |                |
| Over ULN         | 302 (50.3)              | 138 (45.0)                    | 0.136          |
| Normal           | 298 (49.7)              | 168 (55.0)                    |                |
| <b>Stage</b>     | 600                     | 306                           |                |
| I/II             | 226 (37.7)              | 118 (38.6)                    | 0.793          |
| III/IV           | 374 (62.3)              | 188 (61.4)                    |                |
| <b>ECOG PS</b>   | 597                     | 306                           |                |
| 0-1              | 484 (81.1)              | 244 (79.7)                    | 0.631          |
| 2-4              | 113 (18.9)              | 62 (20.3)                     |                |
| <b>ESI</b>       | 600                     | 306                           |                |
| 0-1              | 460 (76.7)              | 224 (73.2)                    | 0.252          |
| > 1              | 140 (23.3)              | 82 (26.8)                     |                |
| <b>IPI</b>       | 597                     | 306                           |                |
| 0-2              | 398 (66.7)              | 201 (65.7)                    | 0.768          |
| > 2              | 199 (33.3)              | 105 (34.3)                    |                |
| <b>B symptom</b> | 597                     | 306                           |                |
| Positive         | 218 (36.5)              | 103 (33.7)                    | 0.396          |
| Negative         | 379 (63.5)              | 203 (66.3)                    |                |

Abbreviations: LDH: serum lactate dehydrogenase; ULN: upper limit of normal; ECOG PS: Eastern Cooperative Oncology Group performance status; ESI: more than one extranodal sites involvement; IPI: International prognostic index.

**Table S2.** The differences of clinical features of DP or TN group between the total cohort and the chemoimmunotherapy cohort

| Variables      | DP           |                    |                | TN           |                    |                |
|----------------|--------------|--------------------|----------------|--------------|--------------------|----------------|
|                | Total cohort | R-CHOP-like cohort | <i>P</i> value | Total cohort | R-CHOP-like cohort | <i>P</i> value |
|                | no.(%)       | no.(%)             |                | no.(%)       | no.(%)             |                |
| <b>Age</b>     | 80           | 49                 |                | 53           | 30                 |                |
| > 60y          | 36 (45)      | 22 (44.9)          | 0.991          | 23 (43.4)    | 13 (43.3)          | 0.996          |
| ≤ 60y          | 44 (55)      | 27 (55.1)          |                | 30 (56.6)    | 17 (56.7)          |                |
| <b>Sex</b>     | 80           | 49                 |                | 53           | 30                 |                |
| Male           | 42 (52.5)    | 25 (51.0)          | 0.870          | 29 (54.7)    | 17 (56.7)          | 0.864          |
| Female         | 38 (47.5)    | 24 (49.0)          |                | 24 (45.3)    | 13 (43.3)          |                |
| <b>LDH</b>     | 79           | 49                 |                | 53           | 30                 |                |
| Over ULN       | 30 (38.0)    | 16 (32.7)          | 0.542          | 25 (47.2)    | 13 (43.3)          | 0.736          |
| Normal         | 49 (62.0)    | 33 (67.3)          |                | 28 (52.8)    | 17 (56.7)          |                |
| <b>Stage</b>   | 79           | 49                 |                | 53           | 30                 |                |
| I/II           | 39 (49.4)    | 25 (51.0)          | 0.856          | 22 (44.0)    | 8 (26.7)           | 0.176          |
| III/IV         | 40 (50.6)    | 24 (49.0)          |                | 31 (56.0)    | 22 (73.3)          |                |
| <b>ECOG PS</b> | 78           | 49                 |                | 53           | 30                 |                |

|                  |          |           |           |       |           |           |       |
|------------------|----------|-----------|-----------|-------|-----------|-----------|-------|
|                  | 0-1      | 66 (84.6) | 40 (81.6) |       | 46 (86.8) | 25 (83.3) |       |
|                  | 2-4      | 12 (15.4) | 9 (18.4)  | 0.660 | 7 (13.2)  | 5 (16.7)  | 0.749 |
| <b>ESI</b>       |          | 79        | 49        |       | 53        | 30        |       |
|                  | 0-1      | 62 (78.5) | 38 (77.6) |       | 43(81.1)  | 22 (73.3) |       |
|                  | > 1      | 17 (21.5) | 11 (22.4) | 0.902 | 10(18.9)  | 8 (26.6)  | 0.408 |
| <b>IPI</b>       |          | 78        | 49        |       | 53        | 30        |       |
|                  | 0-2      | 59 (75.6) | 37 (75.5) |       | 41 (77.4) | 20 (66.7) |       |
|                  | > 2      | 19 (24.4) | 12 (24.5) | 0.987 | 12 (22.6) | 10 (33.3) | 0.289 |
| <b>B symptom</b> |          | 78        | 49        |       | 53        | 30        |       |
|                  | Positive | 18 (23.1) | 11 (22.4) |       | 17 (32.1) | 12 (40.0) |       |
|                  | Negative | 60 (76.9) | 38 (77.6) | 0.935 | 36 (67.9) | 18 (60.0) | 0.467 |

---

Abbreviations: GCB: germinal center B-cell; DP: double positive (CD10<sup>+</sup>MUM1<sup>+</sup>); LDH: serum lactate dehydrogenase; ULN: upper limit of normal; ECOG PS: Eastern Cooperative Oncology Group performance status; ESI: more than one extranodal sites involvement; IPI: International prognostic inde

## **Figure Legends**

**Figure S1.** The immunohistochemical staining of the antibodies used in this study.

(A) CD10 positive. (B) CD10 negative. (C) MUM1 positive. (D) MUM1 negative. (E) Bcl6 positive. (F) Bcl6 negative. (G) Myc positive. (H) Myc negative. (I) Bcl2 positive. (J) Bcl2 negative.

**Figure S2.** FISH results of each probe

(A) *MYC*-R<sup>+</sup>. (B) *MYC*-R<sup>-</sup>. (C) *BCL2*-R<sup>+</sup>. (D) *BCL2*-R<sup>-</sup>. (E) *BCL6*-R<sup>+</sup>. (F) *BCL6*-R<sup>-</sup>.

Abbreviations: R: rearrangement; <sup>+</sup>: positive; <sup>-</sup>: negative.

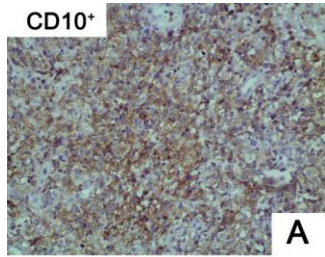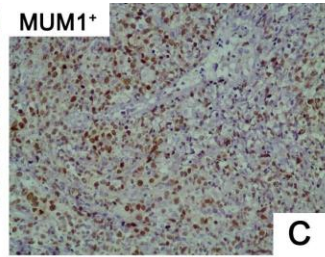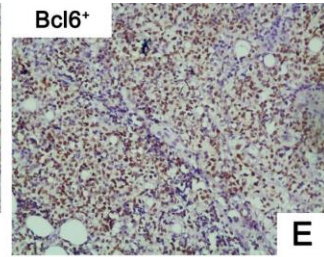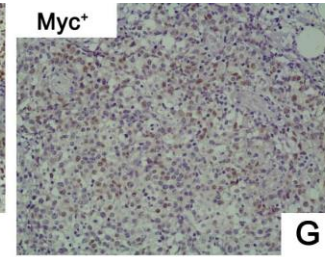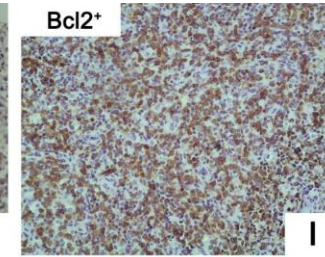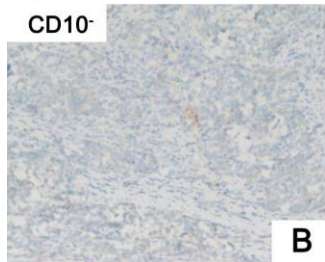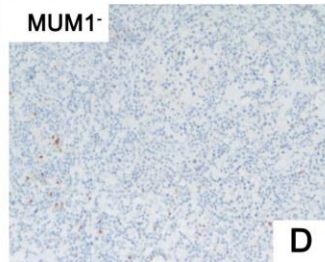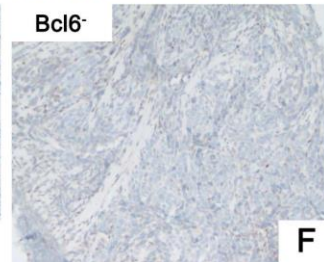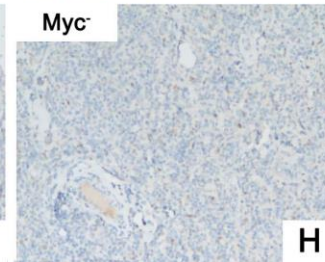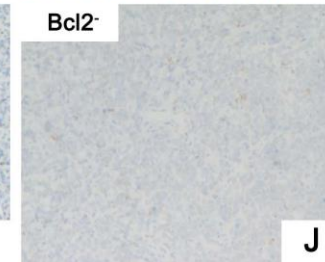



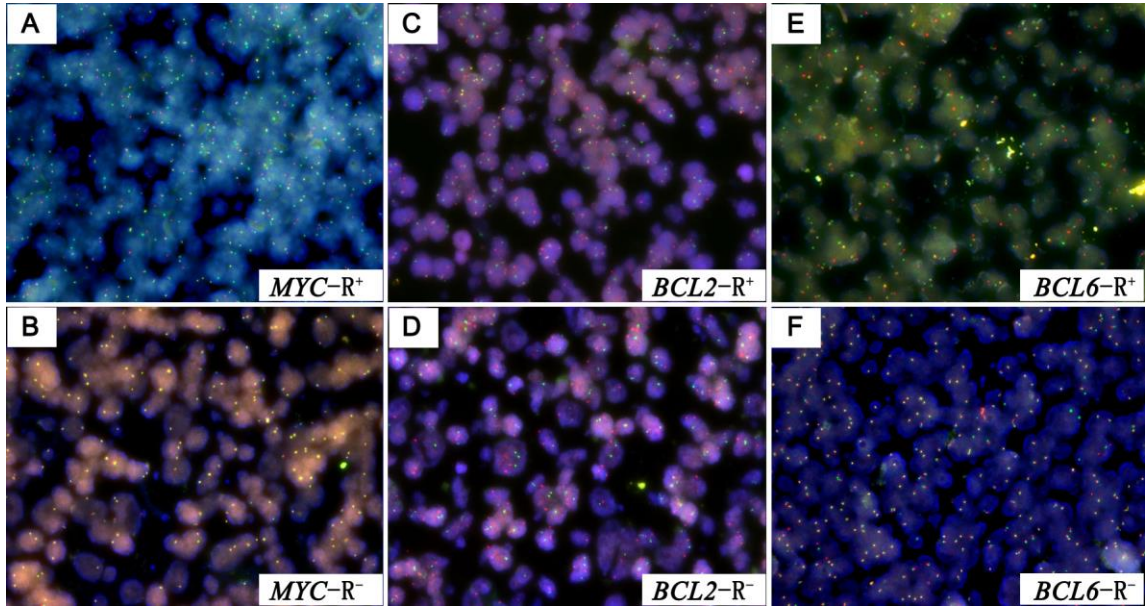

Supplement: srep20465-s1.pdf [file srep20465-s1.pdf]
